# Supplementary material
Source: MDPI journal article supplement (https://www.mdpi.com/2073-8994/16/2/133)
Supplement: s1 [file s1]

## Supporting Information

### **Absolute Configuration of Peyssonoside A using Vibrational Circular Dichroism Spectroscopy: A Day-and-Night Difference Made by f-functions**

Andrew R. Puente,<sup>1</sup> Bhuwan K. Chhetri,<sup>2</sup> Julia M. Kubanek,<sup>2</sup> and Prasad L. Polavarapu<sup>1</sup>

<sup>1</sup>Department of Chemistry, Vanderbilt University, Nashville, TN 37235

<sup>2</sup>School of Chemistry and Biochemistry, Georgia Institute of Technology, Atlanta, GA 30332, USA

#### **Summary of Supplementary Information**

**Figure S1:** Conformers for diastereomer **1** at the B3PW91/6-311G(3df,2pd)/PCM level

**Figure S2:** Conformers for diastereomer **2** at the B3PW91/6-311G(3df,2pd)/PCM level

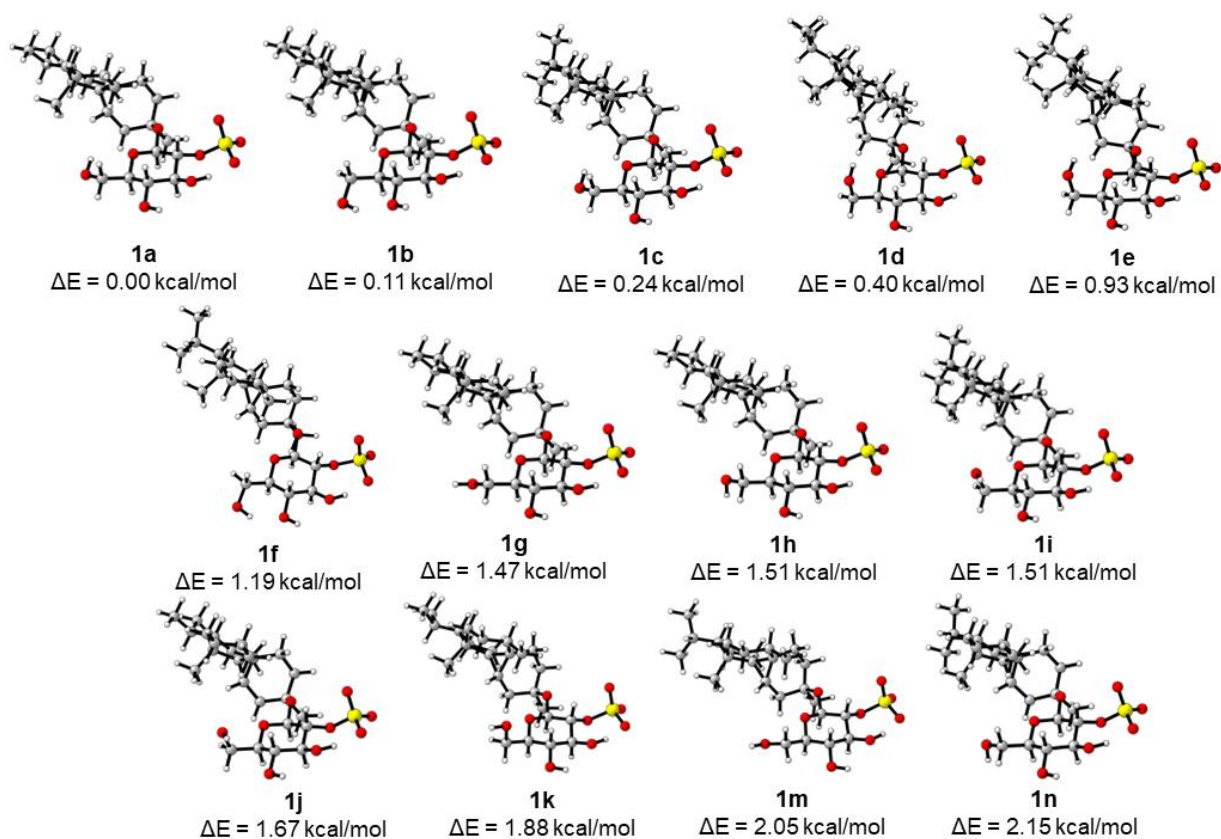

**Figure 1.** The 13 unique conformers for diastereomer **1** at the B3PW91/6-311G(3df,2pd)/PCM level.

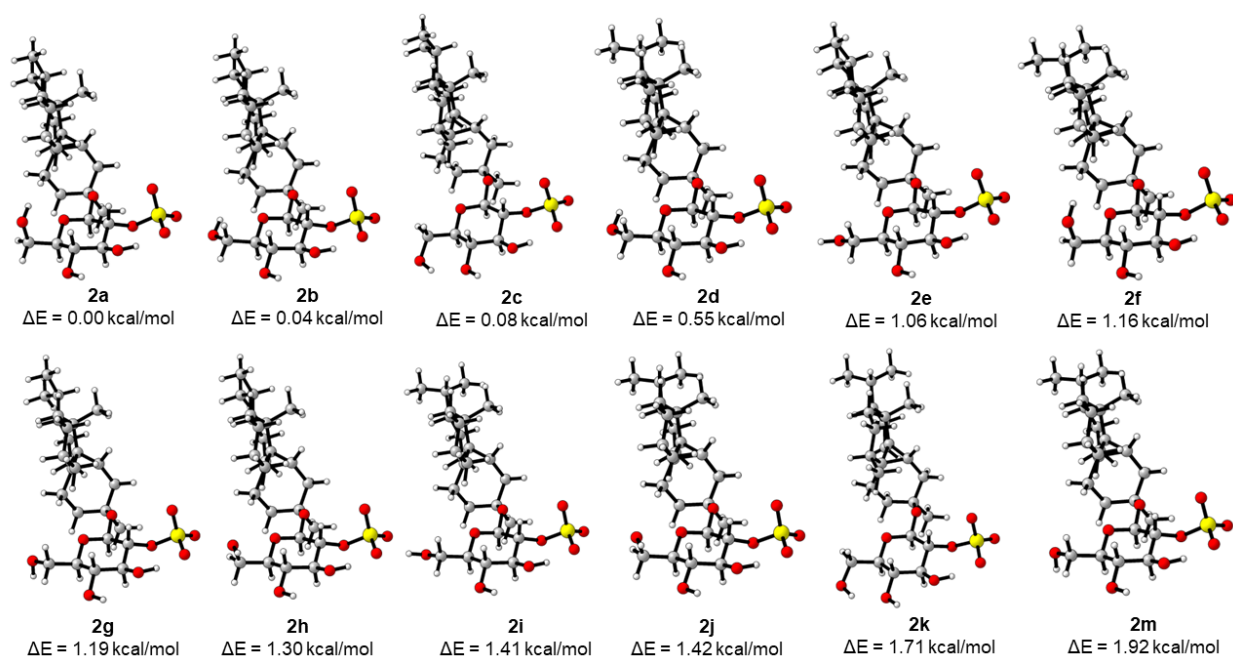

**Figure 2.** The 12 unique conformers for diastereomer **2** at the B3PW91/6-311G(3df,2pd)/PCM level.
